# Supplementary material
Source: PubMed Central journal article supplement (PMC1299173)
Supplement: 5-7400278s1.pdf [file 5-7400278s1.pdf]

Supplement Fig.1

Bajohrs et al.

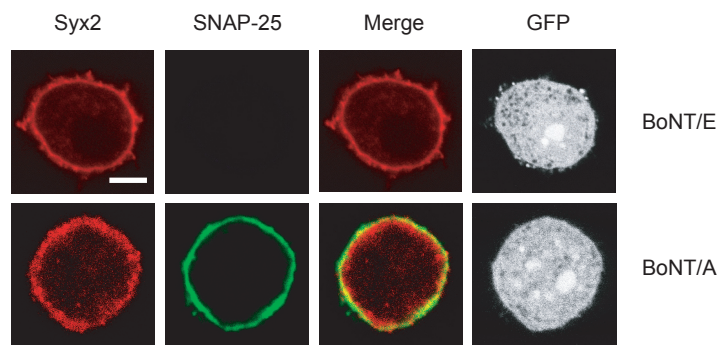

## **Supplementary material**

**Fig 1** Partial colocalisation of SNAP-25 with syntaxin2 persists upon BoNT/A LC but not BoNT/E LC expression in PC 12 cells. Control PC12 cells or cells transfected with either BoNT/E or BoNT/A light chains were immunostained two days after transfection using rabbit syntaxin2 (Syx1) and mouse SNAP-25 antibodies. Scale bar: 5  $\mu$ m.
